# Supplementary figures and images for: Maternal n-7 Unsaturated Fatty Acids Protect the Fetal Brain from Neuronal Degeneration in an Intrauterine Hyperglycemic Animal Model
Source: MDPI journal article supplement (doi:10.3390/nu15153434), 2023-08-03

Supplemental Figure 2

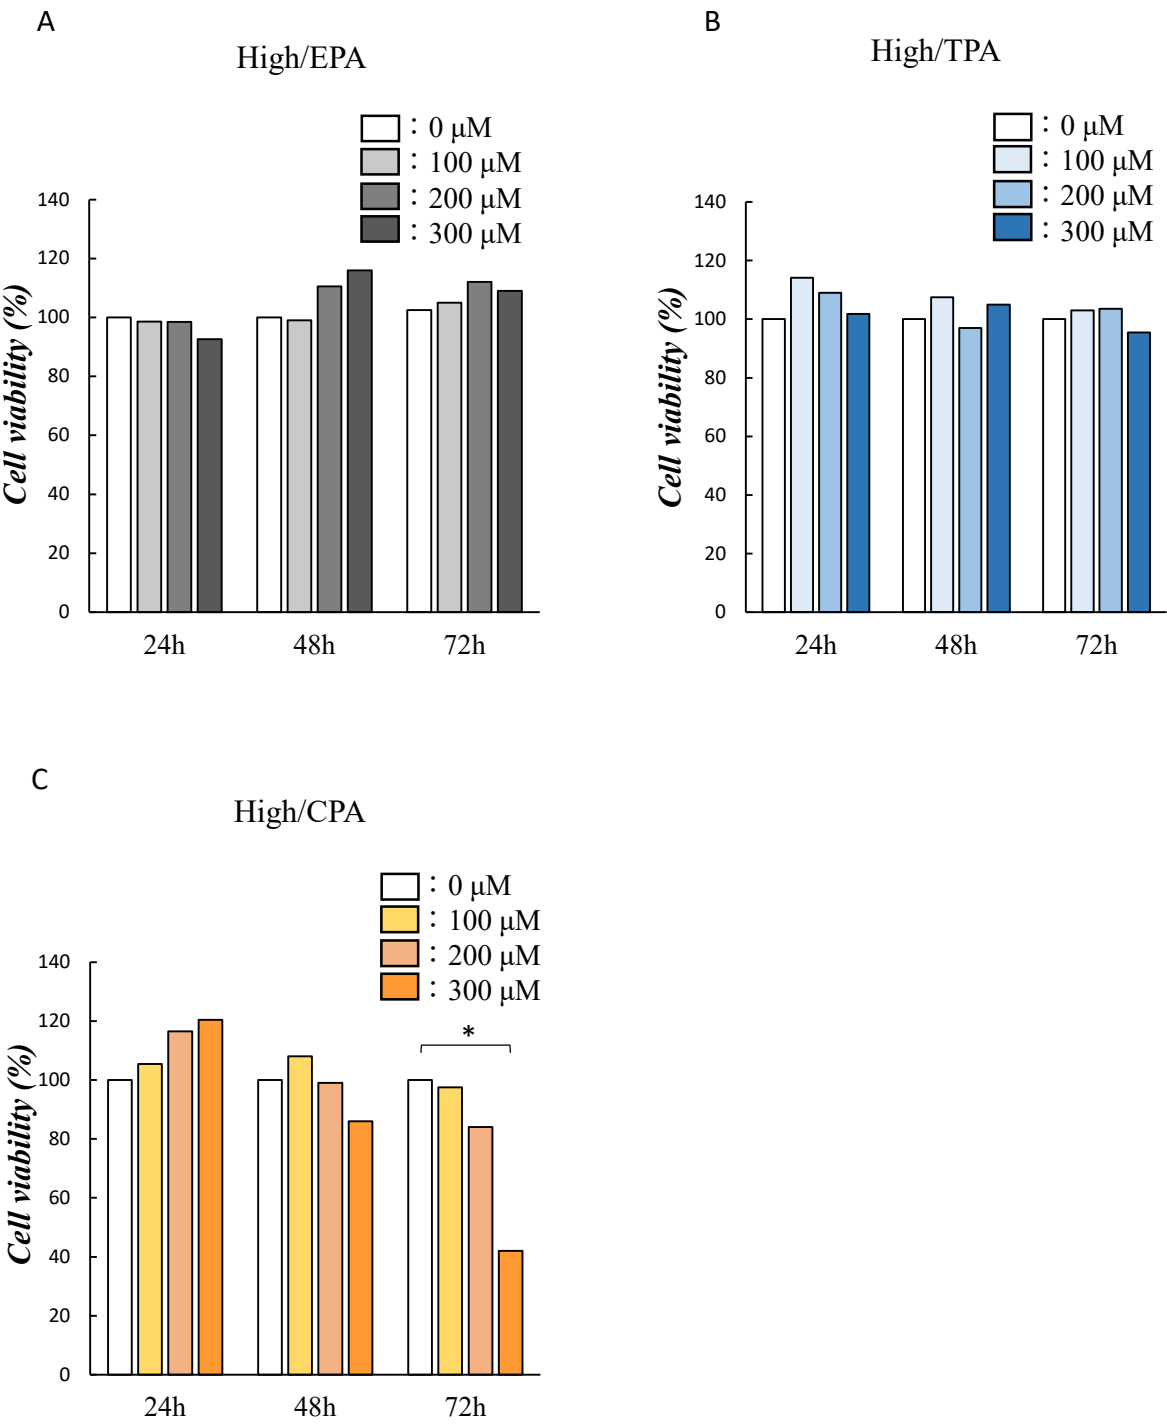

Supplement: s1 [file s1]

Supplemental Figure 1

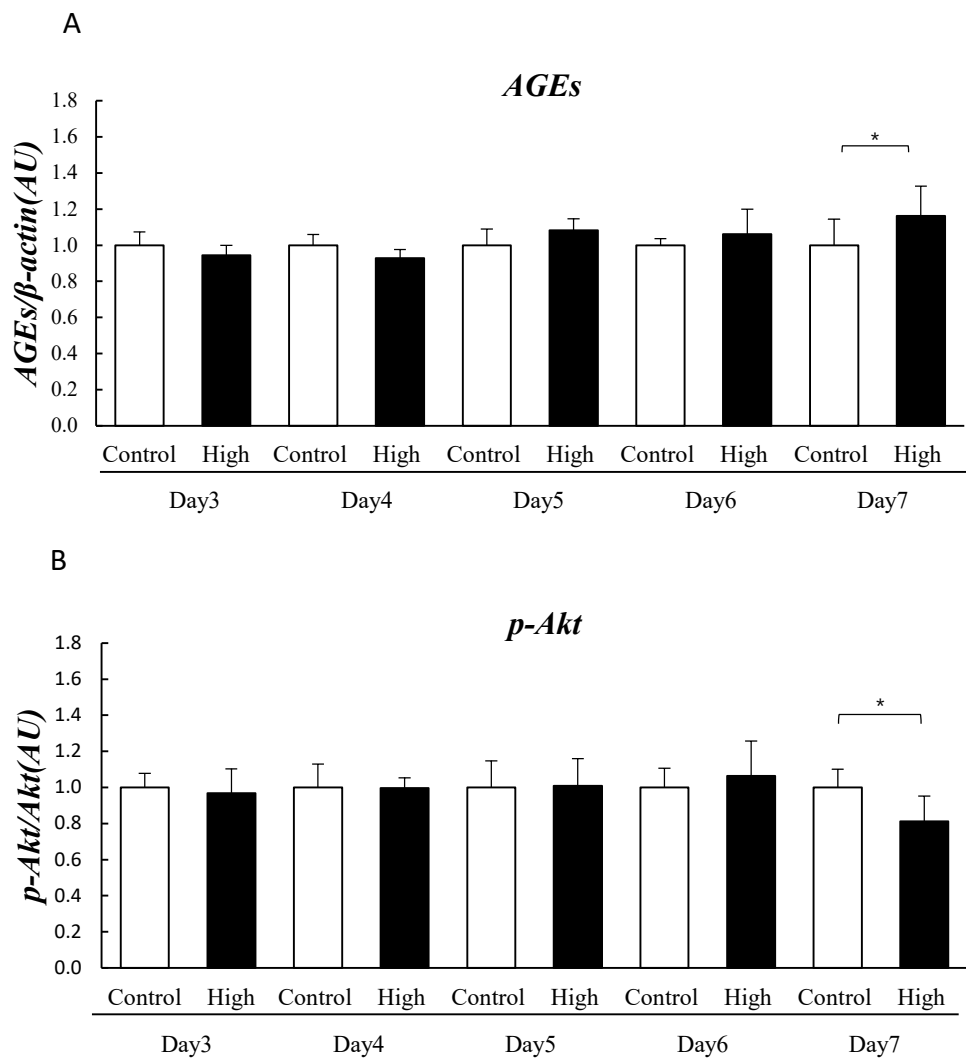

Supplement: s1 [file s1]
